# Supplementary material for: Examining the relationship between household air pollution and infant microbial nasal carriage in a Ghanaian cohort
Source: PubMed Central journal article supplement — Environ Int. Author manuscript; Available in PMC 2019 Dec 1. (PMC6868532; doi:10.1016/j.envint.2019.105150), 2019-09-10
Supplement: NIHMS1059269-supplement-Supplemental.pdf [file NIHMS1059269-supplement-Supplemental.pdf]

## Supplementary Materials

**Supplementary Table 1.** MassTag PCR results, count of positives by arm of study and disease status (n = 260)

| Arm (n)              | All Samples          |                  | Cases               |                 | Controls            |                 |
|----------------------|----------------------|------------------|---------------------|-----------------|---------------------|-----------------|
|                      | 3 Stone<br>(n = 122) | LPG<br>(n = 138) | 3 Stone<br>(n = 67) | LPG<br>(n = 63) | 3 Stone<br>(n = 55) | LPG<br>(n = 75) |
| Rhinovirus           | 79                   | 87               | 44                  | 48              | 35                  | 39              |
| Influenza A          | 3                    | 5                | 3                   | 3               | 0                   | 2               |
| HPIV1                | 5                    | 6                | 3                   | 3               | 2                   | 3               |
| HPIV2                | 3                    | 2                | 3                   | 1               | 0                   | 1               |
| HPIV3                | 10                   | 22               | 7                   | 18              | 3                   | 4               |
| Metapneumovirus      | 4                    | 1                | 4                   | 0               | 0                   | 1               |
| Corona NL63          | 5                    | 8                | 4                   | 4               | 1                   | 4               |
| Corona OC43          | 5                    | 0                | 4                   | 0               | 1                   | 0               |
| RSVA                 | 4                    | 0                | 4                   | 0               | 0                   | 0               |
| <i>H.influenzae</i>  | 89                   | 67               | 54                  | 26              | 35                  | 41              |
| <i>S. pneumoniae</i> | 106                  | 101              | 60                  | 45              | 46                  | 56              |
| <i>M.catarrhalis</i> | 94                   | 72               | 57                  | 38              | 37                  | 34              |
| Adenovirus           | 1                    | 3                | 1                   | 0               | 0                   | 3               |

**Supplementary Figure 1:** Cumulative proportion of swabs (n = 260) that tested positive for bacterial species by child's age.

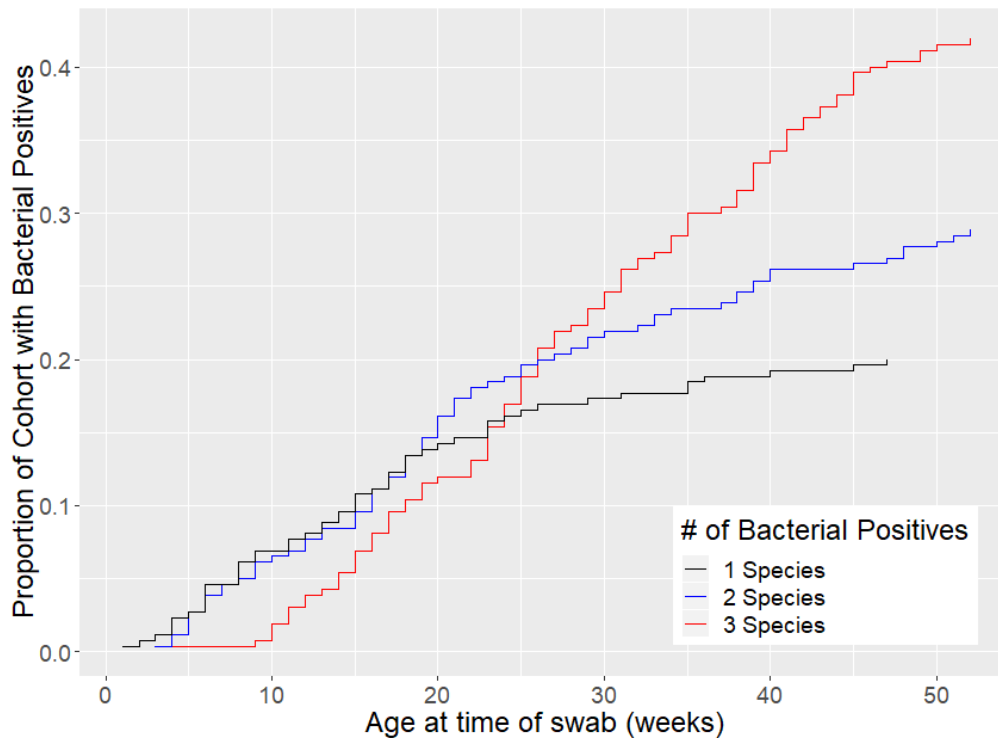

**Supplementary Table 2.** Variance in maternal exposure (CO) attributable to arm of study (stove assignment) and individual participant variability – all GRAPHS participants (N = 1414). R<sup>2</sup> calculated from linear mixed effects models.

| Variable                     | R <sup>2</sup> | Intraclass correlation (95% CI) |
|------------------------------|----------------|---------------------------------|
| Arm of Study                 | 0.025%         | -                               |
| Participant random intercept | 37.81%         | 0.102 (0.078-0.127)             |

**Supplementary Table 3.** Odds ratios from multinomial logistic regressions with corresponding p values. All models adjusted for age at swab, sex, and season swabbed.

| # of bacterial species | Disease status   | Recent Postnatal CO | p value      | Mean Prenatal CO | p value | Postnatal Mean CO | p value      |
|------------------------|------------------|---------------------|--------------|------------------|---------|-------------------|--------------|
|                        |                  |                     |              |                  |         |                   |              |
| 1                      | All Participants | 1.55                | <b>0.038</b> | 0.92             | 0.789   | 1.41              | 0.133        |
|                        | Cases            | 2.04                | <b>0.039</b> | 1.78             | 0.207   | 2.15              | <b>0.043</b> |
|                        | Controls         | 1.28                | 0.383        | 0.48             | 0.139   | 1.07              | 0.837        |
| 2                      | All Participants | 1.28                | 0.216        | 1.23             | 0.505   | 1.11              | 0.617        |
|                        | Cases            | 1.19                | 0.556        | 1.97             | 0.144   | 1.08              | 0.811        |
|                        | Controls         | 1.36                | 0.264        | 0.67             | 0.415   | 1.15              | 0.651        |
| 3                      | All Participants | 1.30                | 0.177        | 1.24             | 0.484   | 1.27              | 0.275        |
|                        | Cases            | 1.67                | 0.092        | 1.72             | 0.237   | 1.67              | 0.120        |
|                        | Controls         | 1.13                | 0.661        | 0.86             | 0.773   | 1.00              | 0.986        |

**Supplementary Table 4.** Odds ratios from logistic regressions with corresponding p values. All models adjusted for age at swab, sex, and season swabbed.

| Species presence      | Disease status   | Recent Postnatal CO | p value | Prenatal Mean CO | p value | Postnatal Mean CO | p value |
|-----------------------|------------------|---------------------|---------|------------------|---------|-------------------|---------|
| <i>H. influenzae</i>  | All Participants | 1.14                | 0.22    | 1.20             | 0.29    | 1.20              | 0.106   |
|                       | Cases            | 1.14                | 0.44    | 1.18             | 0.53    | 1.17              | 0.379   |
|                       | Controls         | 1.15                | 0.33    | 1.26             | 0.36    | 1.22              | 0.200   |
| <i>M. catarrhalis</i> | All Participants | 0.85                | 0.15    | 1.26             | 0.20    | 0.90              | 0.359   |
|                       | Cases            | 0.99                | 0.97    | 1.26             | 0.41    | 1.00              | 0.985   |
|                       | Controls         | 0.83                | 0.22    | 1.23             | 0.41    | 0.85              | 0.333   |
| <i>S. pneumoniae</i>  | All Participants | 1.12                | 0.39    | 0.99             | 0.96    | 1.01              | 0.947   |
|                       | Cases            | 1.31                | 0.16    | 1.09             | 0.78    | 1.21              | 0.351   |
|                       | Controls         | 1.03                | 0.86    | 0.86             | 0.62    | 0.86              | 0.487   |
